# Supplementary material for: Recursive Cluster Elimination (RCE) for classification and feature selection from gene expression data
Source: Springer Nature journal article supplement (doi:10.1186/1471-2105-8-144), 2007-05-02
Supplement: 12859_2006_1516_MOESM2_ESM.pdf [file 12859_2006_1516_MOESM2_ESM.pdf]

**Figure 3:** Left panels show an overview of the data CTCL(I) by Hierarchical clustering of different numbers of significant clusters of genes detected by SVM-RCE while the right panel show the overview of the same data with same number of genes detected by SVM-RFE. When 3 or 4 clusters are used for classification, a cluster of 4 up-regulated genes (IL-11RA, PLS3, TPR and TLE1) defines a sub-cluster of 9 or 10 patients seen in panels b and c (left). Another sub-cluster of 2 patients, S107 and S113 are characterized by extremely elevated WDR39, TNSF10, G1P2, and RSAD2. This sub-cluster structure is not seen when genes are selected by SVM-RFE, (right panels) which appears to select different genes which are more uniformly expressed across the patient samples.
