# Supplementary material for: Recursive Cluster Elimination (RCE) for classification and feature selection from gene expression data
Source: Springer Nature journal article supplement (doi:10.1186/1471-2105-8-144), 2007-05-02

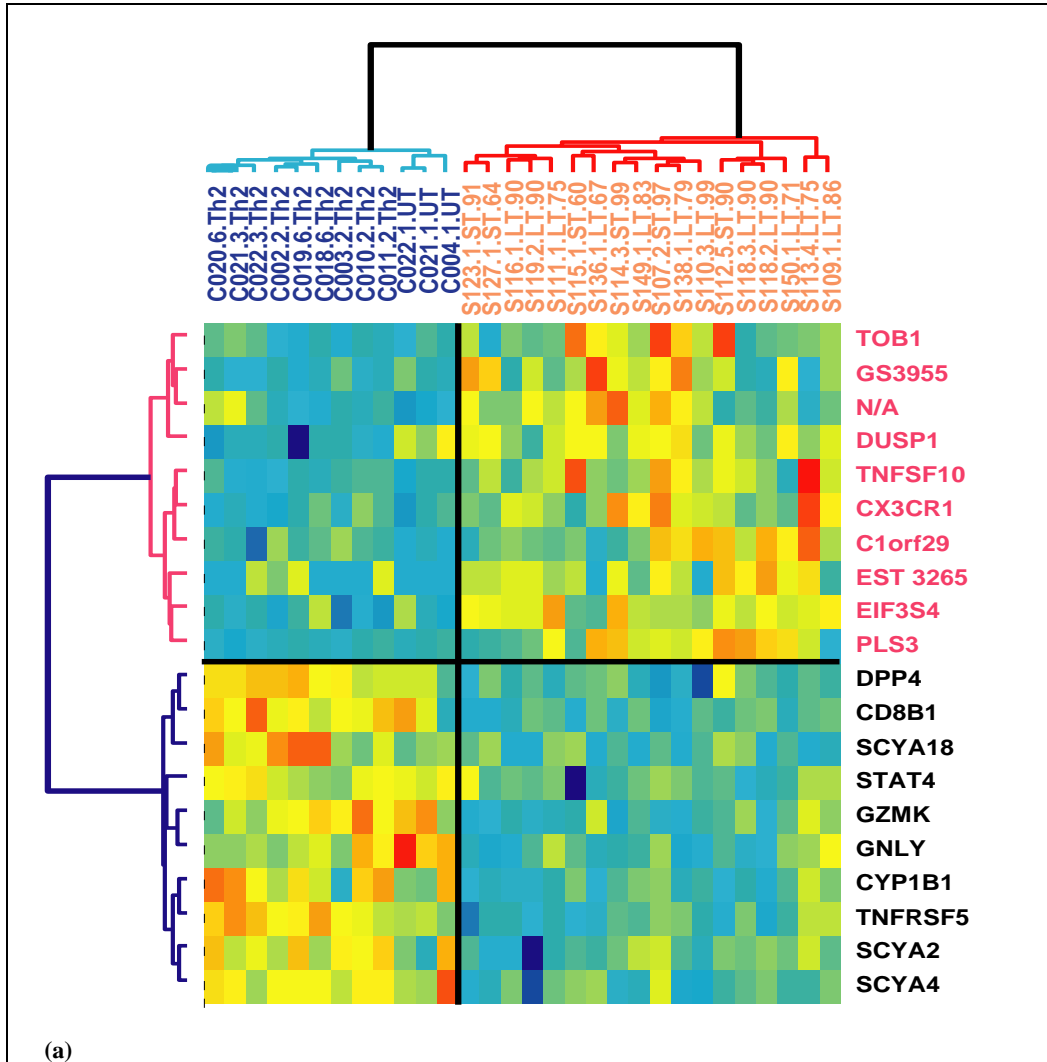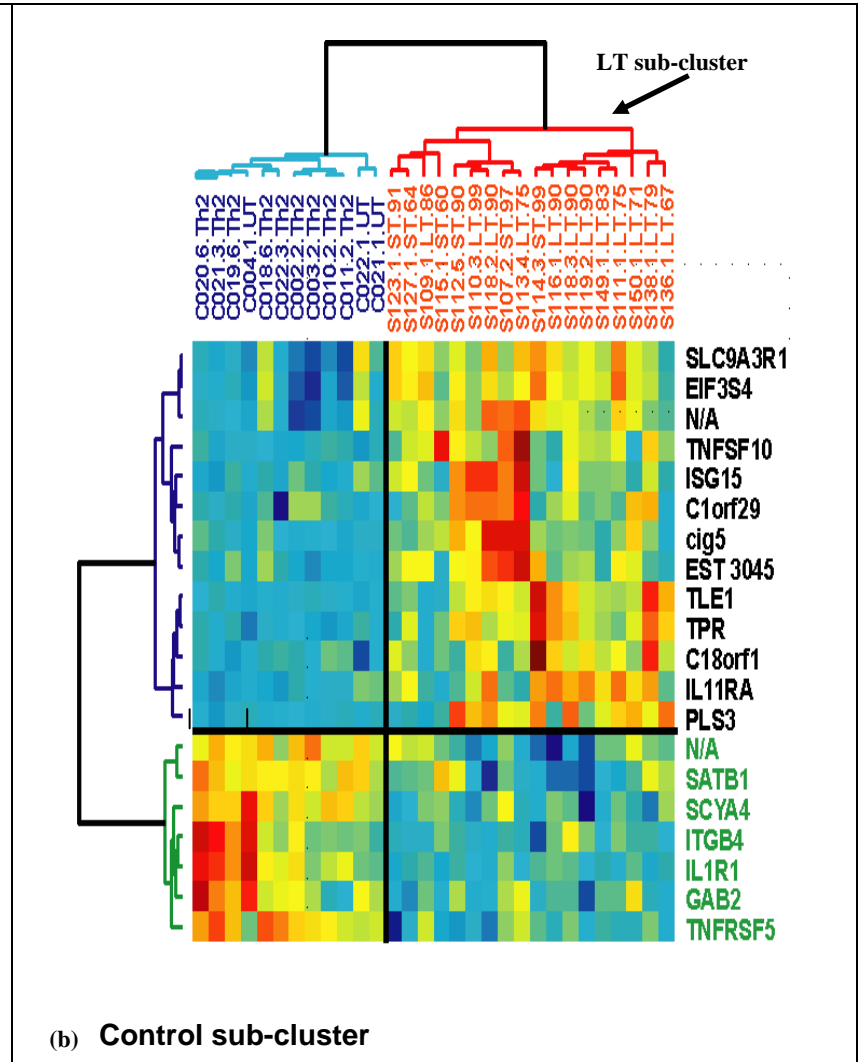

Supplement: 12859_2006_1516_MOESM4_ESM.pdf [file 12859_2006_1516_MOESM4_ESM.pdf]
